# Supplementary material
Source: ML conference proceedings conference paper supplement (https://openaccess.thecvf.com/content/CVPR2024/html/Liang_GS-IR_3D_Gaussian_CVPR_2024_paper.html)
Supplement: Supplementary file 1 [file Liang_GS-IR_3D_Gaussian_CVPR_2024_supplemental.pdf]

# GS-IR: 3D Gaussian Splatting for Inverse Rendering - Supplementary Material

Zhihao Liang<sup>1,\*</sup>, Qi Zhang<sup>2,\*</sup>, Ying Feng<sup>2</sup>, Ying Shan<sup>2</sup>, Kui Jia<sup>3,†</sup>

<sup>1</sup>South China University of Technology, <sup>2</sup>Tencent AI Lab,

<sup>3</sup>School of Data Science, The Chinese University of Hong Kong, Shenzhen

eezhihaoliang@mail.scut.edu.cn, nwpuzhang@gmail.com,

vonyfeng@gmail.com, yingsshan@tencent.com, kuijia@cuhk.edu.cn

## 1. Implementation Details

We implement GS-IR in PyTorch framework [6] with CUDA extensions, and customized the baking-based method for GS-IR.

**Representation.** In the vanilla GS [3], each 3D Gaussian utilizes learnable  $\mathcal{T} = \{\mathbf{p}, \mathbf{s}, \mathbf{q}\}$  and  $\mathcal{A} = \{\alpha, \mathbf{f}_c\}$  to describe its geometric properties and volumetric appearance respectively, where  $\mathbf{p}$  denotes the position vector,  $\mathbf{s}$  denotes the scaling vector,  $\mathbf{q}$  denotes the unit quaternion for rotation,  $\alpha$  denotes the opacity and  $\mathbf{f}_c$  denotes spherical harmonics (SH) coefficients for view-dependent color. In GS-IR, we use  $\mathbf{n}$  to present the normal vector of 3D Gaussian and extend the geometric properties as  $\mathcal{T} = \{\mathbf{p}, \mathbf{s}, \mathbf{q}, \mathbf{n}\}$ . In addition, we introduce  $\mathcal{M} = \{\mathbf{a}, \rho, m\}$  to describe the material of 3D Gaussian.

**Training Details.** We use the Adam optimizer [4] for training, and the training process includes the initial stage (*cf.* Sec. 4.1) and decomposition stage (*cf.* Sec. 4.3). In the initial stage, we minimize color reconstruction loss  $\mathcal{L}_c$  and normal loss  $\mathcal{L}_n$  (*cf.* Eq. (9)) to optimize  $\mathcal{T}, \mathcal{A}$  for 30K iterations. In the decomposition stage, we fix  $\mathcal{T}, \mathcal{A}$  and minimize the proposed decomposition loss  $\mathcal{L}_d$  (*cf.* Eq. (16)) to merely optimize  $\mathcal{M}$  for 10K iterations. The total optimization is running on a single V100 GPU.

**Loss Definition.** In the initial stage, the supervision loss  $\mathcal{L}_{\text{init}}$  consists of the L1 color reconstruction loss  $\mathcal{L}_c$  and our proposed normal loss  $\mathcal{L}_n$ :

$$\begin{aligned} \mathcal{L}_{\text{init}} &= \mathcal{L}_c + \mathcal{L}_n \\ \mathcal{L}_n &= \mathcal{L}_{n-p} + \lambda_{n-TV} TV_{\text{normal}} \end{aligned} \quad (1)$$

the smoothing term  $TV_{\text{normal}}$  in our proposed normal loss  $\mathcal{L}_n$  is a total variation (TV) loss conditioned by the predicted normal map  $\hat{\mathbf{N}}$  and the given reference image  $\mathbf{I}$ :

$$\begin{aligned} \Delta_{ij}^{\hat{\mathbf{N}}} &= \exp(-|\mathbf{I}_{i,j} - \mathbf{I}_{i-1,j}|) (\hat{\mathbf{N}}_{i,j} - \hat{\mathbf{N}}_{i-1,j})^2 + \\ &\quad \exp(-|\mathbf{I}_{i,j} - \mathbf{I}_{i,j-1}|) (\hat{\mathbf{N}}_{i,j} - \hat{\mathbf{N}}_{i,j-1})^2, \\ TV_{\text{normal}} &= \frac{1}{|\hat{\mathbf{N}}|} \sum_{i,j} \Delta_{ij}^{\hat{\mathbf{N}}}. \end{aligned} \quad (2)$$

In the decomposition stage, the supervision loss  $\mathcal{L}_d$  includes  $\mathcal{L}_{\text{shade}}, \mathcal{L}_{\text{material}}, \mathcal{L}_{\text{light}}$ :

$$\mathcal{L}_d = \underbrace{\|\mathbf{I} - \hat{\mathbf{I}}^{\text{shade}}(\hat{\mathbf{M}}, \hat{\mathbf{E}}, \mathcal{V}^{\text{illu}})\|}_{\mathcal{L}_{\text{shade}}} + \underbrace{\lambda_{\mathbf{M}} TV_{\text{mat}}}_{\mathcal{L}_{\text{material}}} + \underbrace{\lambda_{\mathbf{E}} TV_{\text{light}}}_{\mathcal{L}_{\text{light}}}, \quad (3)$$

the smoothing term  $TV_{\text{mat}}$  in Eq. (3) is a TV loss similar to  $TV_{\text{normal}}$  in Eq. (2):

$$\begin{aligned} \Delta_{ij}^{\hat{\mathbf{M}}} &= \exp(-|\mathbf{I}_{i,j} - \mathbf{I}_{i-1,j}|) (\hat{\mathbf{M}}_{i,j} - \hat{\mathbf{M}}_{i-1,j})^2 + \\ &\quad \exp(-|\mathbf{I}_{i,j} - \mathbf{I}_{i,j-1}|) (\hat{\mathbf{M}}_{i,j} - \hat{\mathbf{M}}_{i,j-1})^2, \\ TV_{\text{mat}} &= \frac{1}{|\hat{\mathbf{M}}|} \sum_{i,j} \Delta_{ij}^{\hat{\mathbf{M}}}, \end{aligned} \quad (4)$$

where  $\hat{\mathbf{M}}$  is the predicted material map. Unlike the above two smoothing terms,  $TV_{\text{light}}$  is defined as:

$$\begin{aligned} \Delta_{ij}^{\hat{\mathbf{E}}} &= (\hat{\mathbf{E}}_{i,j} - \hat{\mathbf{E}}_{i-1,j})^2 + (\hat{\mathbf{E}}_{i,j} - \hat{\mathbf{E}}_{i,j-1})^2, \\ TV_{\text{light}} &= \frac{1}{|\hat{\mathbf{E}}|} \sum_{i,j} \Delta_{ij}^{\hat{\mathbf{E}}}. \end{aligned} \quad (5)$$

During training, we set  $\lambda_{n-TV}, \lambda_{\mathbf{M}}, \lambda_{\mathbf{E}}$  to 5.0, 1.0, 0.01. And we study the efficacy of these smoothing terms in Sec. 5.

## 2. Occlusion Caching and Recovery

In the baking stage (*cf.* Sec. 4.2), we introduce SH architectures and cache occlusion into occlusion volumes  $\mathcal{V}^{\text{occl}}$  as illustrated in Fig. 1a. For each volume  $\mathbf{v}_i^{\text{occl}} \subset \mathcal{V}^{\text{occl}}$ , we set six cameras with FoV of  $90^\circ$  and non-overlapping each other, and perform six render passes to obtain the depth cubemap  $\{\hat{\mathbf{D}}_p^i\}_{p=1}^6$ . Then we convert  $\{\hat{\mathbf{D}}_p^i\}_{p=1}^6$  into the occlusion cubemap  $\{\hat{\mathbf{O}}_p^i\}_{p=1}^6$  and store the principal components of occlusion into SH coefficients  $\mathbf{f}_x^o$ .

In the decomposition stage, we recover the ambient occlusion (AO) for each surface point  $\mathbf{x}$  from occlusion volumes  $\mathcal{V}^{\text{occl}}$ . The first step is to get the coefficients  $\mathbf{f}_x^o$  of the point  $\mathbf{x}$ . Considering that AO of the point  $\mathbf{x}$  only calculates the occlusion integral of the upper hemisphere  $\Omega$  of the normal  $\mathbf{n}$ , we thus conduct masked-trilinear interpolation to get the correct coefficients. As illustrated in Fig. 1b,

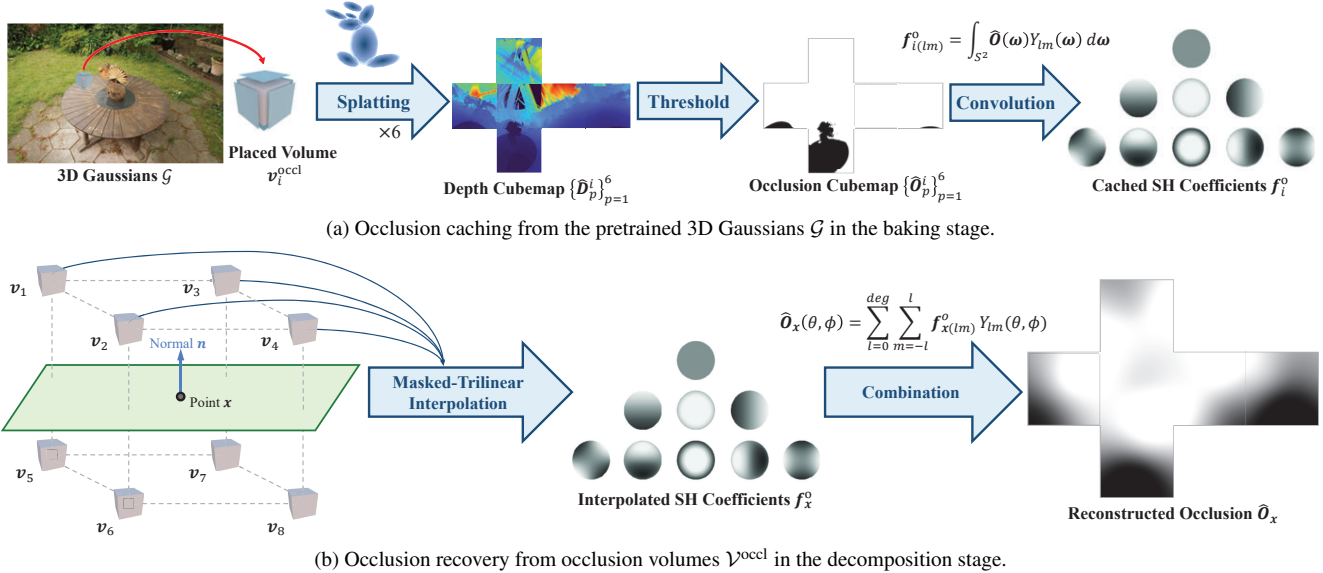

Figure 1. Occlusion caching and recovery in GS-IR.

| Scene     | Method    | Normal MAE ↓ | Novel View Synthesis |        |         | Albedo |        |         | Relight |        |         |
|-----------|-----------|--------------|----------------------|--------|---------|--------|--------|---------|---------|--------|---------|
|           |           |              | PSNR ↑               | SSIM ↑ | LPIPS ↓ | PSNR ↑ | SSIM ↑ | LPIPS ↓ | PSNR ↑  | SSIM ↑ | LPIPS ↓ |
| Lego      | NeRFactor | 9.767        | 26.076               | 0.881  | 0.151   | 25.444 | 0.937  | 0.112   | 23.246  | 0.865  | 0.156   |
|           | InvRender | 9.980        | 24.391               | 0.883  | 0.151   | 21.435 | 0.882  | 0.160   | 20.117  | 0.832  | 0.171   |
|           | NVDiffrec | 12.486       | 30.056               | 0.945  | 0.059   | 21.353 | 0.849  | 0.166   | 20.088  | 0.844  | 0.114   |
|           | TensorIR  | 5.980        | 34.700               | 0.968  | 0.037   | 25.240 | 0.900  | 0.145   | 28.581  | 0.944  | 0.081   |
|           | Ours      | 8.078        | 34.379               | 0.968  | 0.036   | 24.958 | 0.889  | 0.143   | 23.256  | 0.842  | 0.117   |
| Hotdog    | NeRFactor | 5.579        | 24.498               | 0.940  | 0.141   | 24.654 | 0.950  | 0.142   | 22.713  | 0.914  | 0.159   |
|           | InvRender | 3.708        | 31.832               | 0.952  | 0.089   | 27.028 | 0.950  | 0.094   | 27.630  | 0.928  | 0.089   |
|           | NVDiffrec | 5.068        | 34.903               | 0.972  | 0.054   | 26.057 | 0.920  | 0.116   | 19.075  | 0.885  | 0.118   |
|           | TensorIR  | 4.050        | 36.820               | 0.976  | 0.045   | 30.370 | 0.947  | 0.093   | 27.927  | 0.933  | 0.115   |
|           | Ours      | 4.771        | 34.116               | 0.972  | 0.049   | 26.745 | 0.941  | 0.088   | 21.572  | 0.888  | 0.140   |
| Armadillo | NeRFactor | 3.467        | 26.479               | 0.947  | 0.095   | 28.001 | 0.946  | 0.096   | 26.887  | 0.944  | 0.102   |
|           | InvRender | 1.723        | 31.116               | 0.968  | 0.057   | 35.573 | 0.959  | 0.076   | 27.814  | 0.949  | 0.069   |
|           | NVDiffrec | 2.190        | 33.664               | 0.983  | 0.031   | 38.844 | 0.969  | 0.076   | 23.099  | 0.921  | 0.063   |
|           | TensorIR  | 1.950        | 39.050               | 0.986  | 0.039   | 34.360 | 0.989  | 0.059   | 34.504  | 0.975  | 0.045   |
|           | Ours      | 2.176        | 39.287               | 0.980  | 0.039   | 38.572 | 0.986  | 0.051   | 27.737  | 0.918  | 0.091   |
| Ficus     | NeRFactor | 6.442        | 21.664               | 0.919  | 0.095   | 22.402 | 0.928  | 0.085   | 20.684  | 0.907  | 0.107   |
|           | InvRender | 4.884        | 22.131               | 0.934  | 0.057   | 25.335 | 0.942  | 0.072   | 20.330  | 0.895  | 0.073   |
|           | NVDiffrec | 4.567        | 22.131               | 0.946  | 0.064   | 30.443 | 0.894  | 0.101   | 17.260  | 0.865  | 0.073   |
|           | TensorIR  | 4.420        | 29.780               | 0.973  | 0.041   | 27.130 | 0.964  | 0.044   | 24.296  | 0.947  | 0.068   |
|           | Ours      | 4.762        | 33.551               | 0.976  | 0.031   | 30.867 | 0.948  | 0.053   | 24.932  | 0.893  | 0.081   |

Table 1. Per-scene results on TensorIR Synthetic dataset. For albedo reconstruction results, we follow NeRFactor [8] and scale each RGB channel by a global scalar.

for the given point  $x$  with normal  $n$ , we firstly find the eight nearest volumes  $\{v_k\}_{k=1}^8$ . In this case, each volume has position vector  $p_k$  and SH coefficients  $f_k^o$ . Given the trilinear interpolation weights  $\{w_k\}_{k=1}^8$ <sup>1</sup> defined in vanilla trilinear

interpolation, we get the coefficients  $f_x^o$ :

$$\begin{aligned} \tilde{w}_k &= \begin{cases} 0, & (p_k - x) \cdot n \leq 0 \\ w_k, & (p_k - x) \cdot n > 0 \end{cases}, \\ \hat{w}_k &= \frac{\tilde{w}_k}{\sum_{k=1}^8 \tilde{w}_k}, \\ f_{x(lm)}^o &= \sum_{k=1}^8 \hat{w}_k f_{k(lm)}^o. \end{aligned} \quad (6)$$

<sup>1</sup>The weights in trilinear interpolation satisfy  $\sum_{k=1}^8 w_k = 1$

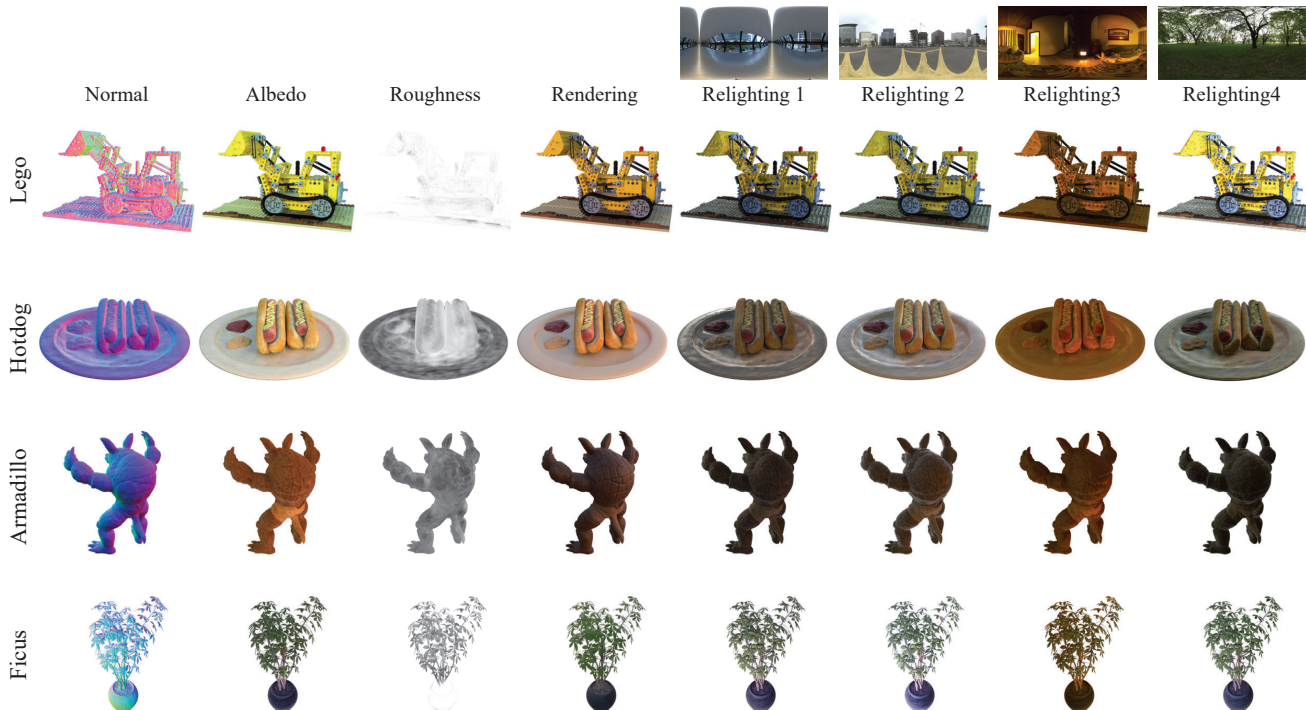

Figure 2. Visualization of our inverse rendering and relighting results on TensorIR Synthetic dataset.

After performing masked-trilinear interpolation, the occlusion  $\hat{O}_x$  is written as:

$$\hat{O}_x(\theta, \phi) = \sum_{l=0}^{deg} \sum_{m=-l}^l f_{x(lm)}^o Y_{lm}(\theta, \phi). \quad (7)$$

For indirect illumination  $I_d^{indir}$  in Eq. (13), we recover it from the volumes  $\mathcal{V}^{illu}$  via vanilla trilinear interpolation.

| Method       | bicycle | flowers | garden | stump | treehill | room  | counter | kitchen | bonsai |
|--------------|---------|---------|--------|-------|----------|-------|---------|---------|--------|
| NeRF++       | 22.64   | 20.31   | 24.32  | 24.34 | 22.20    | 28.87 | 26.38   | 27.80   | 29.15  |
| Plenoxels    | 21.91   | 20.10   | 23.49  | 20.66 | 22.25    | 27.59 | 23.62   | 23.42   | 24.67  |
| INGP-Base    | 22.19   | 20.35   | 24.60  | 23.63 | 22.36    | 29.27 | 26.44   | 28.55   | 30.34  |
| INGP-Big     | 22.17   | 20.65   | 25.07  | 23.47 | 22.37    | 29.69 | 26.69   | 29.48   | 30.69  |
| Mip-NeRF 360 | 24.40   | 21.64   | 26.94  | 26.36 | 22.81    | 29.69 | 26.69   | 29.48   | 30.69  |
| 3DGS         | 25.25   | 21.52   | 27.41  | 26.55 | 22.49    | 30.63 | 28.70   | 30.32   | 31.98  |
| Ours         | 23.80   | 20.57   | 25.72  | 25.37 | 21.79    | 28.79 | 26.22   | 27.99   | 28.18  |

Table 2. PSNR scores for Mip-NeRF360 scenes.

| Method       | bicycle | flowers | garden | stump | treehill | room  | counter | kitchen | bonsai |
|--------------|---------|---------|--------|-------|----------|-------|---------|---------|--------|
| NeRF++       | 0.526   | 0.453   | 0.635  | 0.594 | 0.530    | 0.530 | 0.802   | 0.816   | 0.876  |
| Plenoxels    | 0.496   | 0.431   | 0.606  | 0.523 | 0.509    | 0.842 | 0.759   | 0.648   | 0.814  |
| INGP-Base    | 0.491   | 0.450   | 0.649  | 0.574 | 0.518    | 0.855 | 0.798   | 0.818   | 0.890  |
| INGP-Big     | 0.512   | 0.486   | 0.701  | 0.594 | 0.542    | 0.871 | 0.817   | 0.858   | 0.906  |
| Mip-NeRF 360 | 0.693   | 0.583   | 0.816  | 0.746 | 0.632    | 0.913 | 0.895   | 0.920   | 0.939  |
| 3DGS         | 0.771   | 0.605   | 0.868  | 0.775 | 0.638    | 0.914 | 0.905   | 0.922   | 0.938  |
| Ours         | 0.706   | 0.543   | 0.804  | 0.716 | 0.586    | 0.867 | 0.839   | 0.867   | 0.883  |

Table 3. SSIM scores for Mip-NeRF360 scenes.

### 3. Results on TensorIR Synthetic Dataset

Tab. 1 provides the results on normal estimation, novel view synthesis, albedo reconstruction, and relighting for all four

| Method       | bicycle | flowers | garden | stump | treehill | room  | counter | kitchen | bonsai |
|--------------|---------|---------|--------|-------|----------|-------|---------|---------|--------|
| NeRF++       | 0.455   | 0.466   | 0.331  | 0.416 | 0.466    | 0.335 | 0.351   | 0.260   | 0.291  |
| Plenoxels    | 0.506   | 0.521   | 0.386  | 0.503 | 0.540    | 0.419 | 0.441   | 0.447   | 0.398  |
| INGP-Base    | 0.487   | 0.481   | 0.312  | 0.450 | 0.489    | 0.301 | 0.342   | 0.254   | 0.227  |
| INGP-Big     | 0.446   | 0.441   | 0.257  | 0.421 | 0.450    | 0.261 | 0.306   | 0.195   | 0.205  |
| Mip-NeRF 360 | 0.289   | 0.345   | 0.164  | 0.254 | 0.338    | 0.211 | 0.203   | 0.126   | 0.177  |
| 3DGS         | 0.205   | 0.336   | 0.103  | 0.210 | 0.317    | 0.220 | 0.204   | 0.129   | 0.205  |
| Ours         | 0.259   | 0.371   | 0.158  | 0.258 | 0.372    | 0.279 | 0.260   | 0.188   | 0.264  |

Table 4. LPIPS scores for Mip-NeRF360 scenes.

scenes. We also visualize the inverse rendering and relighting results of GS-IR in Fig. 2.

### 4. Results on Mip-NeRF 360

For Mip-NeRF 360 [1], a dataset captured from the real world, we list the results on novel view synthesis (*i.e.* PSNR, SSIM, and LPIPS) of GS-IR and some NeRF variants [2, 5, 7] in Tabs. 2 to 4. In addition, we provide the normal estimation, novel view synthesis, and relighting results of all seven publicly available scenes in Fig. 3.

### 5. Ablation on Loss

The loss in GS-IR consists of contrast terms and smoothing terms. For contrast terms, we set the weights of color reconstruction loss  $\mathcal{L}_c$ , normal penalty loss  $\mathcal{L}_{n-p}$ , and shade loss  $\mathcal{L}_{shade}$  to 1, which is intuitive. And the smoothing terms include  $TV_{normal}$ ,  $TV_{mat}$ , and  $TV_{light}$ , we evaluate their efficacy by adjusting their weights (*i.e.*  $\lambda_{n-TV}$ ,  $\lambda_E$ , and  $\lambda_M$ ), and the ablation results are shown in Tab. 5.

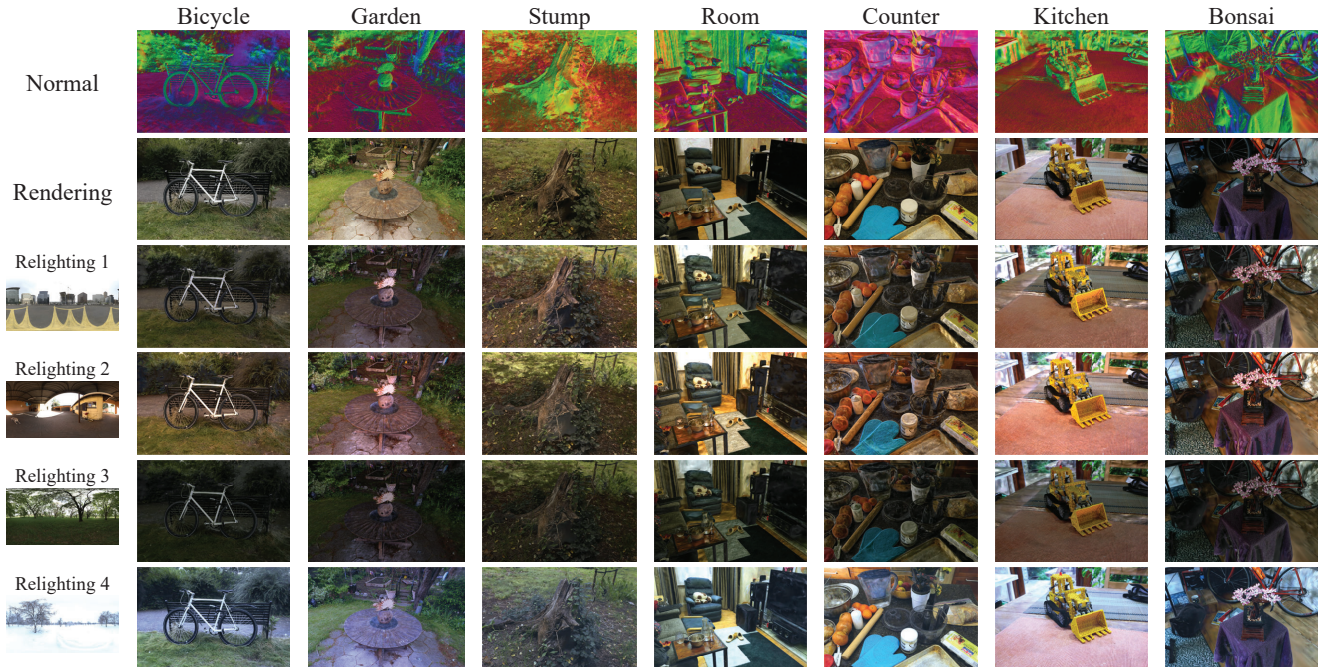

Figure 3. Visualization of our inverse rendering and relighting results on the Mip-NeRF 360 dataset.

| $\lambda_{n-TV}$ | $\lambda_E$ | $\lambda_M$ | Normal       | Novel View Synthesis |              |              | Albedo        |              |              |
|------------------|-------------|-------------|--------------|----------------------|--------------|--------------|---------------|--------------|--------------|
|                  |             |             | MAE ↓        | PSNR ↑               | SSIM ↑       | LPIPS ↓      | PSNR ↑        | SSIM ↑       | LPIPS ↓      |
|                  |             |             | 5.030        | 35.170               | 0.970        | 0.042        | 30.083        | 0.938        | 0.090        |
| ✓                |             |             | <b>4.948</b> | 35.330               | <b>0.974</b> | 0.039        | 30.216        | 0.940        | 0.088        |
| ✓                | ✓           |             | <b>4.948</b> | 35.230               | 0.972        | 0.040        | 30.236        | 0.940        | 0.087        |
| ✓                |             | ✓           | <b>4.948</b> | 35.314               | 0.973        | <b>0.038</b> | 30.275        | <b>0.941</b> | 0.085        |
| ✓                | ✓           | ✓           | <b>4.948</b> | <b>35.333</b>        | <b>0.974</b> | 0.039        | <b>30.286</b> | <b>0.941</b> | <b>0.084</b> |

Table 5. Analysis of the impact of different loss terms on the TensoIR dataset. ✓ indicates setting the smoothing term to be valid.

## References

- [1] Jonathan T Barron, Ben Mildenhall, Dor Verbin, Pratul P Srinivasan, and Peter Hedman. Mip-nerf 360: Unbounded anti-aliased neural radiance fields. In *Proceedings of the IEEE/CVF Conference on Computer Vision and Pattern Recognition*, pages 5470–5479, 2022. 3
- [2] Sara Fridovich-Keil, Alex Yu, Matthew Tancik, Qinhong Chen, Benjamin Recht, and Angjoo Kanazawa. Plenoxels: Radiance fields without neural networks. In *Proceedings of the IEEE/CVF Conference on Computer Vision and Pattern Recognition*, pages 5501–5510, 2022. 3
- [3] Bernhard Kerbl, Georgios Kopanas, Thomas Leimkühler, and George Drettakis. 3d gaussian splatting for real-time radiance field rendering. *ACM Transactions on Graphics (ToG)*, 42(4): 1–14, 2023. 1
- [4] Diederik P Kingma and Jimmy Ba. Adam: A method for stochastic optimization. *arXiv preprint arXiv:1412.6980*, 2014. 1
- [5] Thomas Müller, Alex Evans, Christoph Schied, and Alexander Keller. Instant neural graphics primitives with a multireso-

lution hash encoding. *ACM Transactions on Graphics (ToG)*, 41(4):1–15, 2022. 3

- [6] Adam Paszke, Sam Gross, Francisco Massa, Adam Lerer, James Bradbury, Gregory Chanan, Trevor Killeen, Zeming Lin, Natalia Gimelshein, Luca Antiga, et al. Pytorch: An imperative style, high-performance deep learning library. *Advances in neural information processing systems*, 32, 2019. 1
- [7] Kai Zhang, Gernot Riegler, Noah Snavely, and Vladlen Koltun. Nerf++: Analyzing and improving neural radiance fields. *arXiv preprint arXiv:2010.07492*, 2020. 3
- [8] Xiuming Zhang, Pratul P Srinivasan, Boyang Deng, Paul Debevec, William T Freeman, and Jonathan T Barron. Nerfactor: Neural factorization of shape and reflectance under an unknown illumination. *ACM Transactions on Graphics (ToG)*, 40(6):1–18, 2021. 2
